# Supplementary material for: Gallium-based metal–organic frameworks loaded with antimicrobial peptides for synergistic killing of drug-resistant bacteria
Source: Royal Society of Chemistry journal article supplement (doi:10.1039/d3tb01754k), 2023-01-01
Supplement: d3tb01754k1.pdf [file d3tb01754k1.pdf]

## **Gallium-based metal–organic framework loaded with antimicrobial peptides for synergistic killing of drug-resistant bacteria**

Shuo Liu,<sup>a,b,c</sup> Yuxin Ji,<sup>a</sup> Hangqi Zhu,<sup>a</sup> Zhishang Shi,<sup>a</sup> Mingchun Li<sup>a</sup> and Qilin Yu<sup>\*a,c</sup>

<sup>a</sup> Key Laboratory of Molecular Microbiology and Technology, Ministry of Education, Department of Microbiology, College of Life Sciences, Nankai University, Tianjin 300071, China

<sup>b</sup> College of Environmental Science and Engineering, Tianjin Key Laboratory of Environmental Remediation and Pollution Control, Nankai University, Tianjin 300350, China

<sup>c</sup> Research Center for Infectious Diseases, Nankai University, Tianjin 300350, China

\* Corresponding author. E-mail: yuqilin@mail.nankai.edu.cn

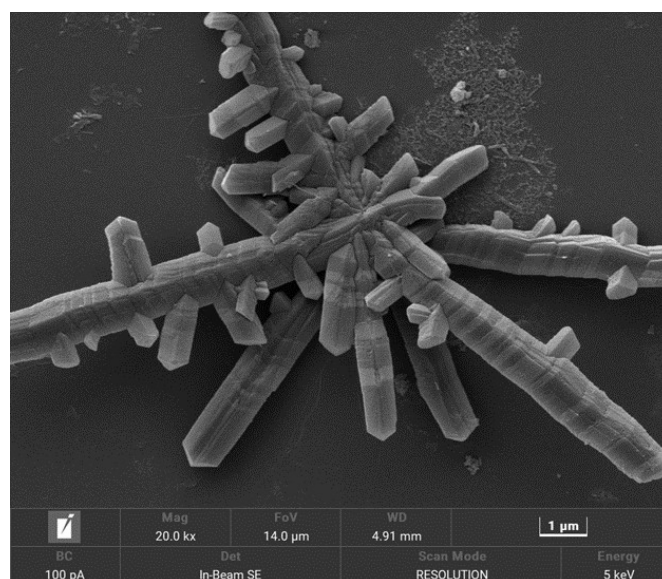

**Fig. S1** An SEM image of M0.

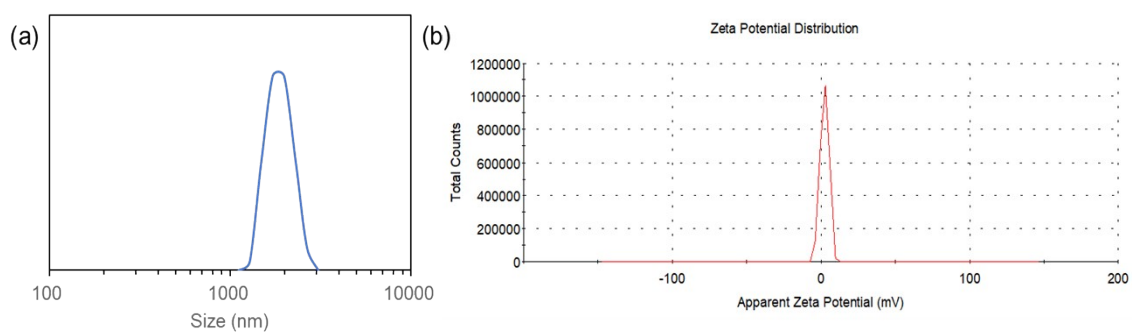

**Fig. S2** DLS (a) and zeta potential (b) of M0.

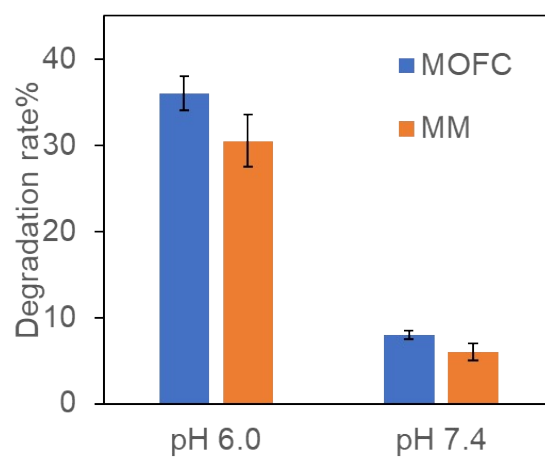

**Fig. S3** Degradation rate of MOFC at different pH.

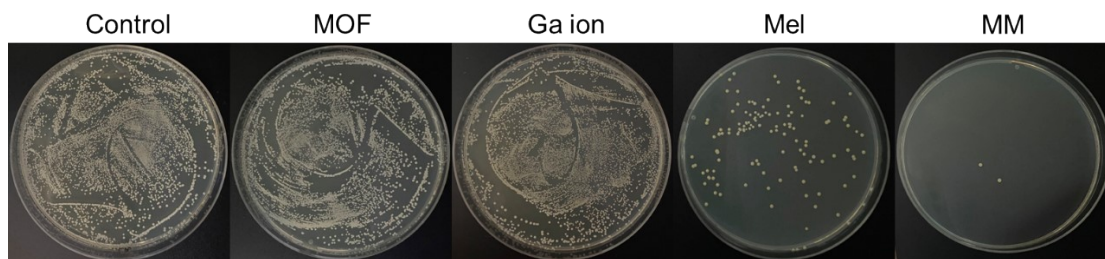

**Fig. S4** Photographs of bacterial colonies growing on the plates after different treatments.

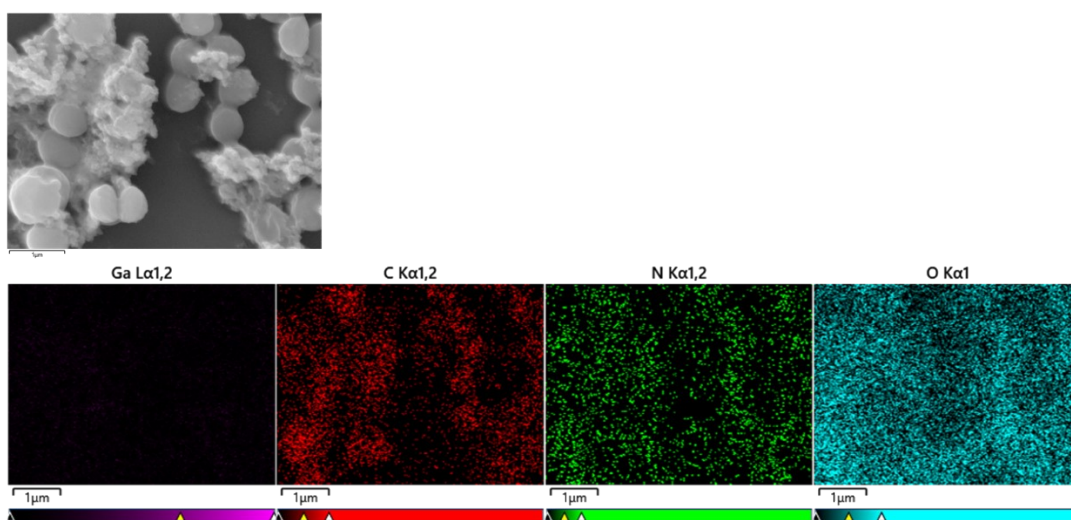

**Fig. S5** EDS mapping of MRSA cells treated by Ga ion plus MEL.

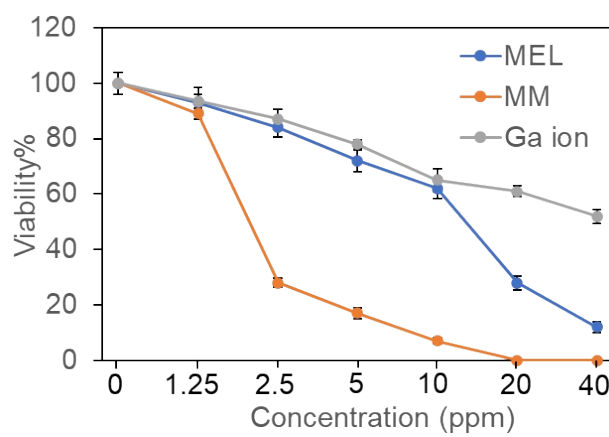

**Fig. S6** Antibacterial curves of Ga ion, MEL and MM.

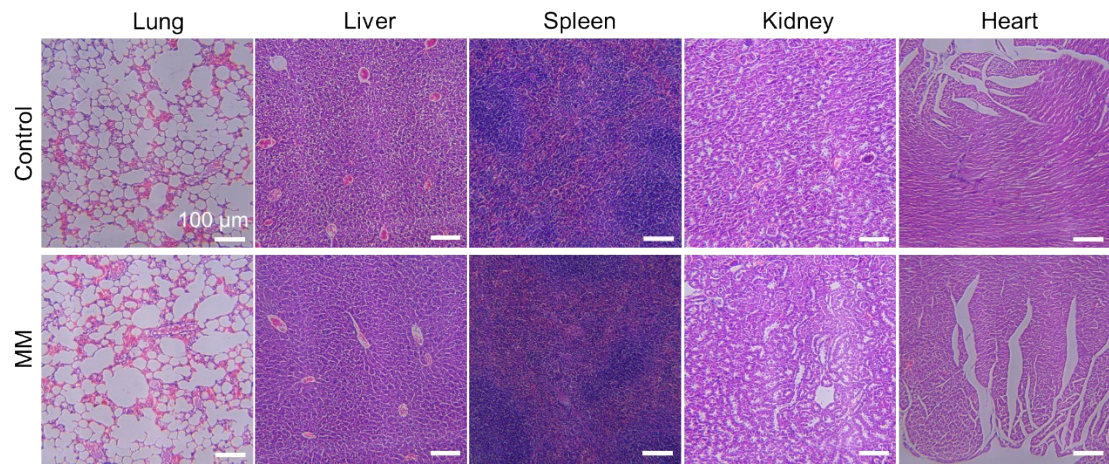

**Fig. S7** Representative H&E staining imaging of the main mouse organs, including lung, liver, spleen, kidney, heart in control and MM treated group.
